# Supplementary material
Source: PubMed Central journal article supplement (PMC5233577)
Supplement: NIHMS834230-supplement-supplementary_material.pdf [file NIHMS834230-supplement-supplementary_material.pdf]

**Supplementary Figure S1. Scatter plots of female-male differences in drinking incidence (%) and gender equality indicators at a country level (n=32 countries).<sup>1</sup>**

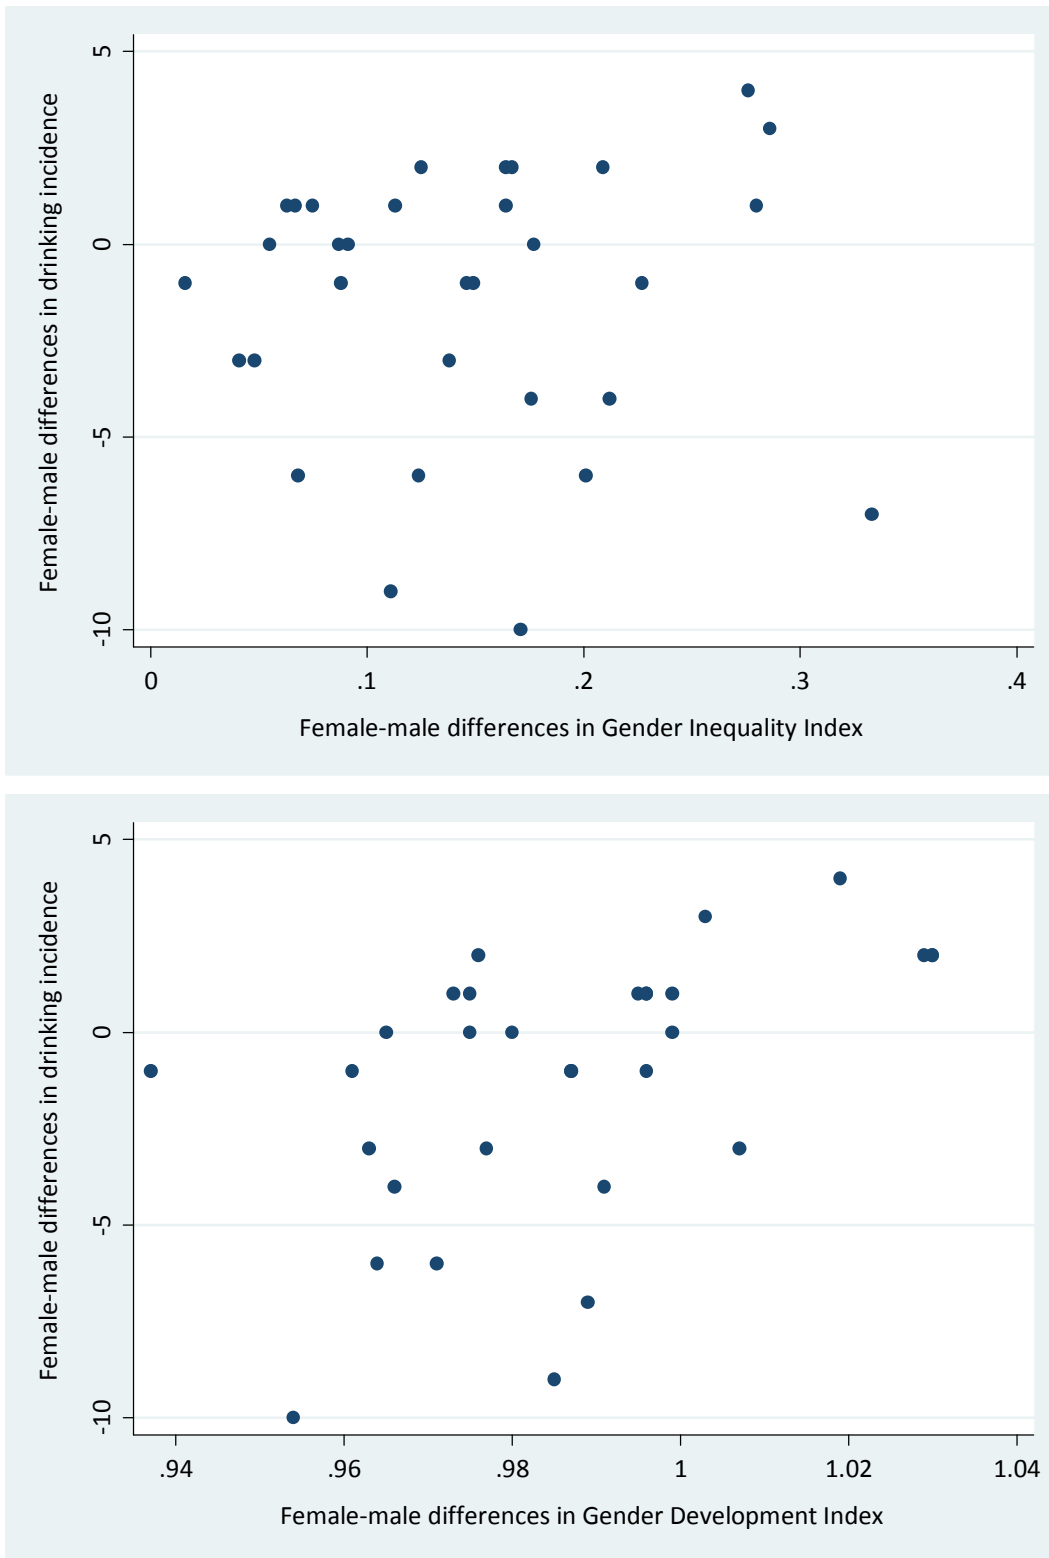



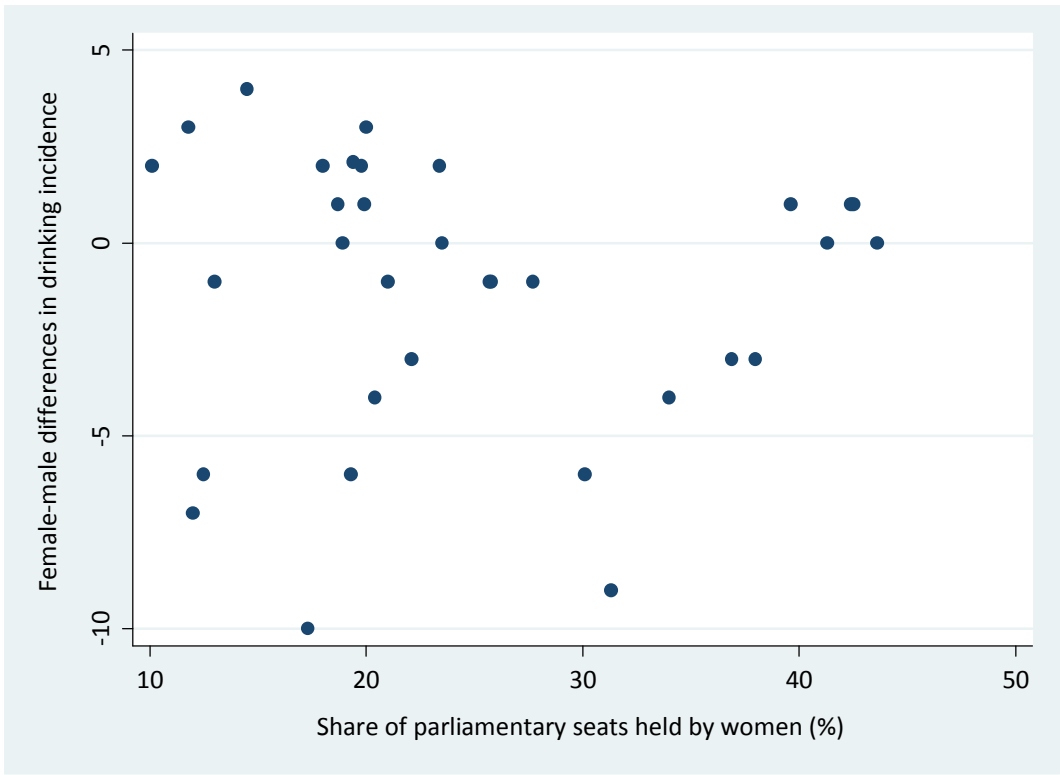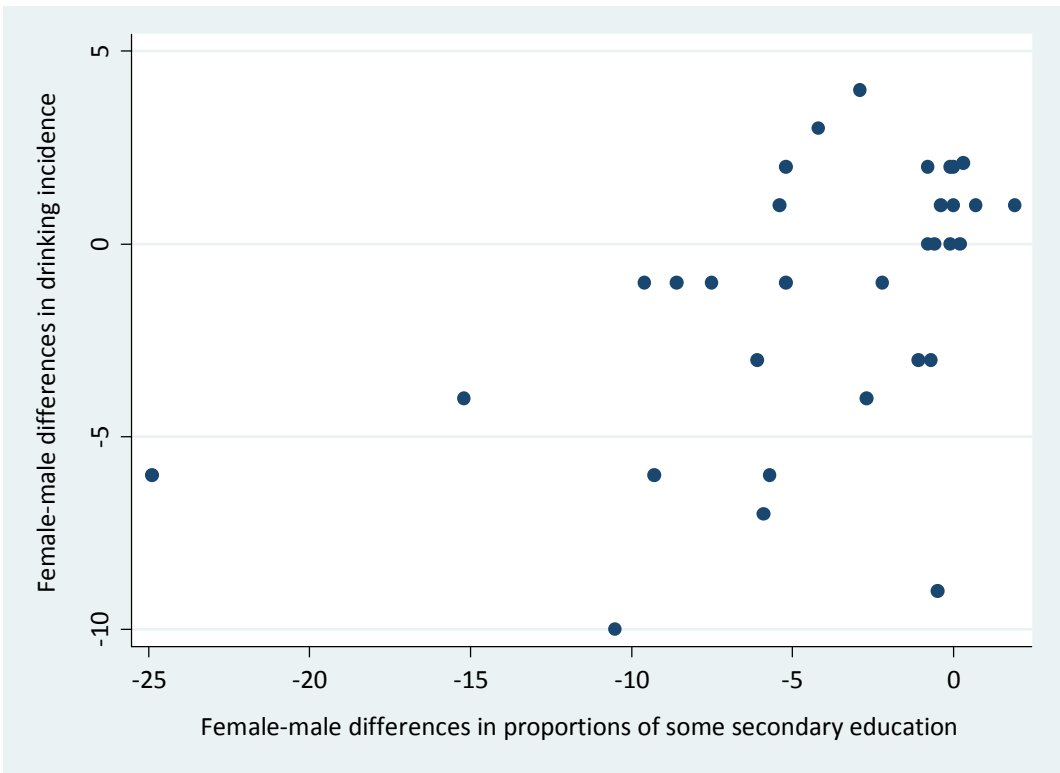

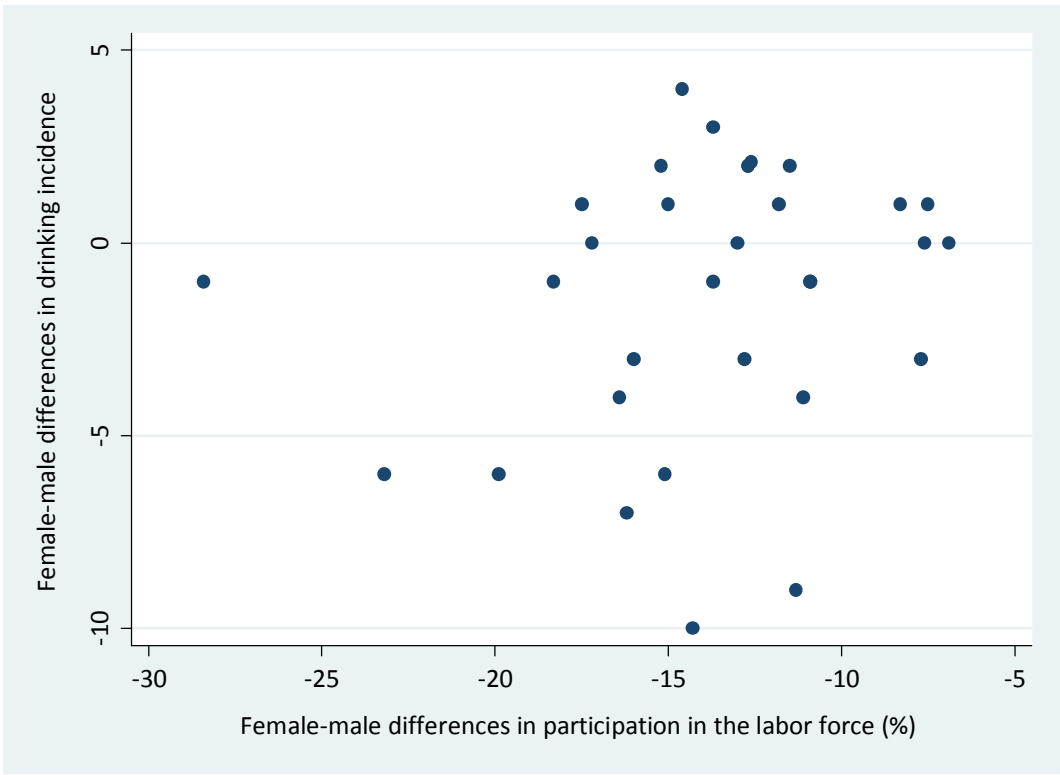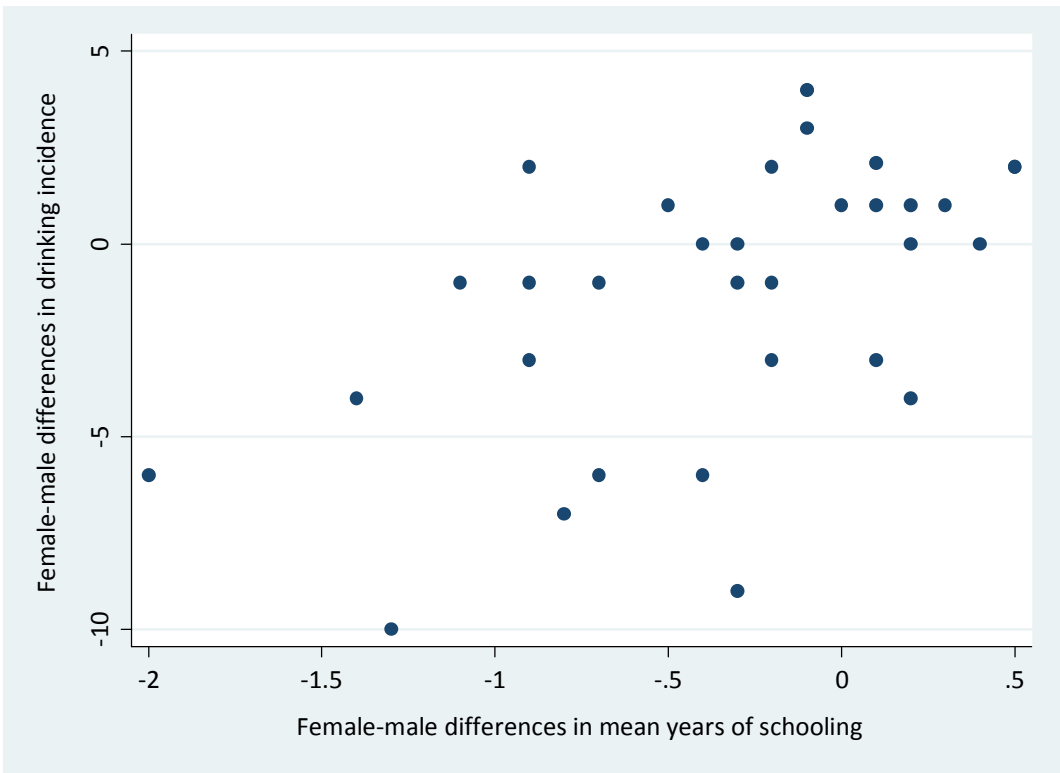

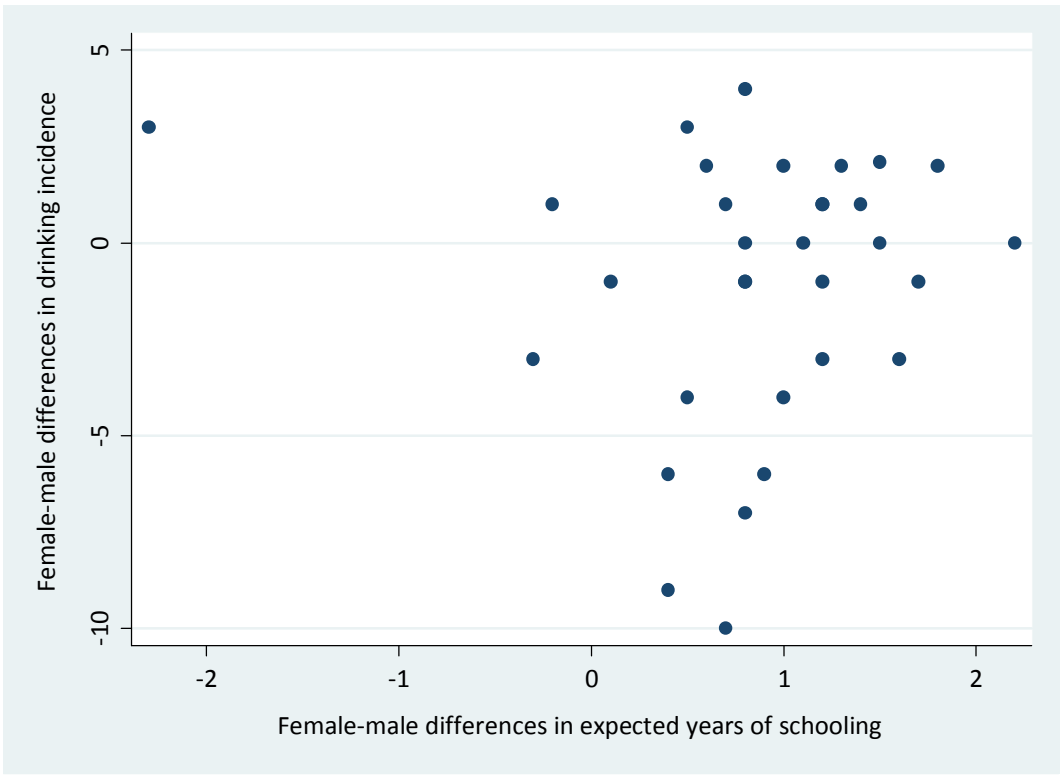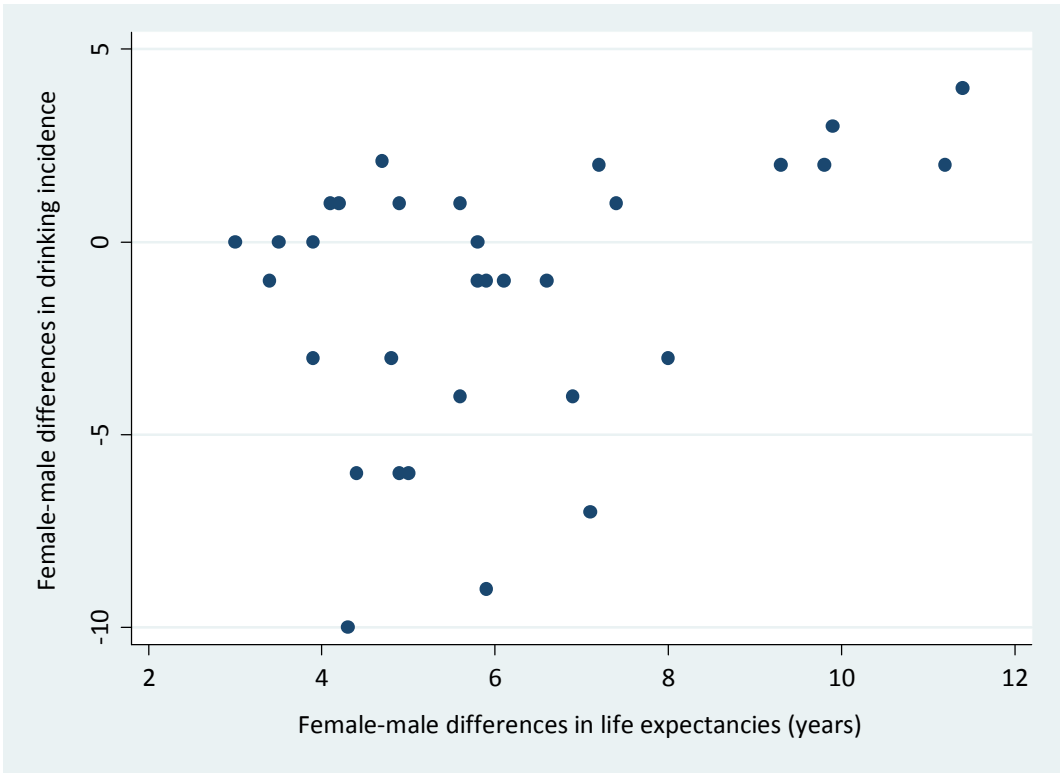

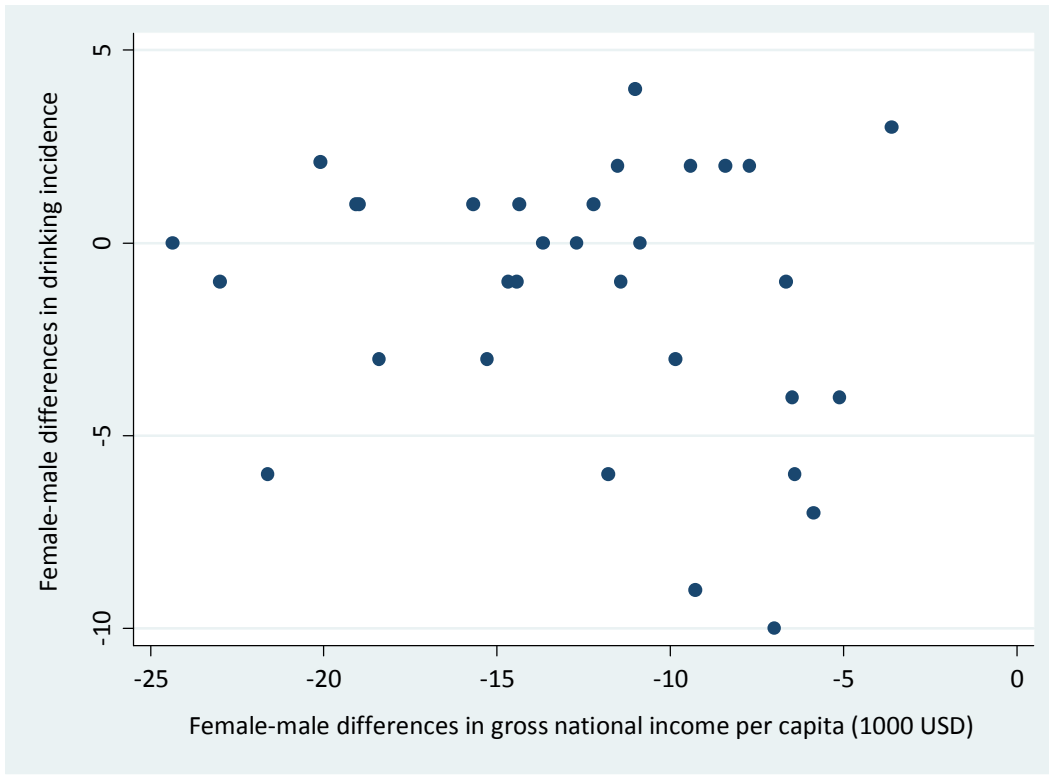


---

<sup>1</sup>Estimated female-male difference in drinking incidence for the United States are derived from cumulative meta-analysis for newly incident drinking in 12-to-17-year-olds; estimates for other countries are for lifetime cumulative incidence of drinking in 15-to-16-year-olds. All indices and indicators are missing for Faroe Islands and Monaco; all but 'mean expected years of schooling' and 'proportion of parliamentary seats held by women' are missing for Liechtenstein; 'expected years of schooling' and GDI is missing for Bosnia and Herzegovina.

---

**Supplementary Figure S2. Female-male differences in drinking incidence (%) in 34 countries participating in the European School Survey Project on Alcohol and Drugs.<sup>1</sup>**

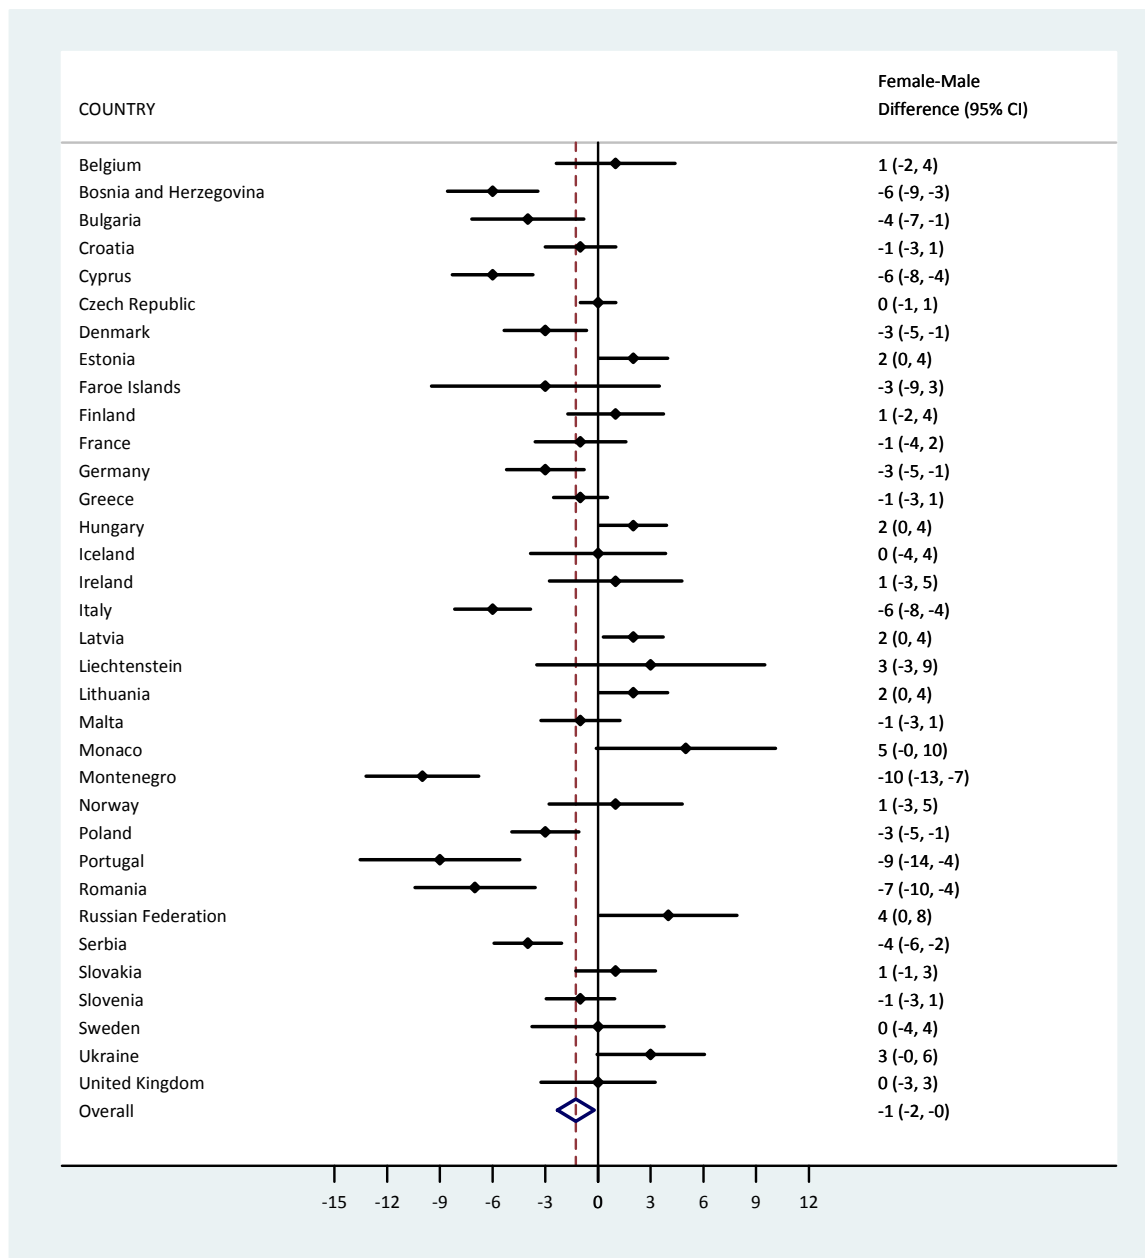

<sup>1</sup> Data are extracted from the ESPAD 2013 report. An inflation factor of 1.3 was applied to the variance estimation. A random-effect estimator was used in the calculation of the meta-analytic summary estimate, due to substantial heterogeneity across countries (heterogeneity chi-squared = 202.96,  $p < 0.001$ ; I-squared = 83.7%).

**Supplementary Table S1. Estimated sex-specific ‘lifetime’ cumulative incidence proportion (%) for alcohol drinking and female-male difference (FMD, %) among school-attending 15-16 year olds. Data from the United States National Survey on Drug Use and Health 2011.**

| Age group                                                   | Females |      | Males |      | FMD (%) | s.e. (%) | s.e. (%) without design effect |
|-------------------------------------------------------------|---------|------|-------|------|---------|----------|--------------------------------|
|                                                             | n       | %    | n     | %    |         |          |                                |
| among all 15-16 year olds irrespective of school attendance |         |      |       |      |         |          |                                |
| 15                                                          | 1582    | 43.0 | 1657  | 40.1 | 2.9     | 2.4      | 2.4                            |
| 16                                                          | 1709    | 53.0 | 1770  | 50.6 | 2.4     | 2.4      | 2.3                            |
| 15 and 16                                                   | 3291    | 48.1 | 3357  | 45.4 | 2.7     | 1.8      | 1.7                            |
| among school-attending 15-16 year olds                      |         |      |       |      |         |          |                                |
| 15                                                          | 1573    | 42.5 | 1637  | 40.1 | 2.4     | 2.4      | 2.4                            |
| 16                                                          | 1671    | 52.5 | 1663  | 50.3 | 2.2     | 2.4      | 2.4                            |
| 15 and 16                                                   | 3244    | 47.6 | 3300  | 45.2 | 2.4     | 1.8      | 1.7                            |
